# Supplementary material for: Ligand-dependent blinking of zinc-blende CdSe/ZnS core/shell nanocrystals
Source: Royal Society of Chemistry journal article supplement (doi:10.1039/b822351c), 2009-01-01
Supplement: b822351c.pdf [file b822351c.pdf]

## Electronic Supplementary Information

### Ligand-Dependent Blinking of Zinc-Blende CdSe/ZnS Core/Shell Nanocrystals<sup>†</sup>

Yongwook Kim,<sup>a</sup> Nam Woong Song,<sup>\*b,c</sup> Hyunung Yu,<sup>b</sup> Dae Won Moon,<sup>b</sup>

Sungjun Lim,<sup>a</sup> Wonjung Kim,<sup>a</sup> Hye-Joo Yoon<sup>a</sup> and Seung Koo Shin<sup>\*a</sup>

<sup>a</sup> Bionanotechnology Center, Department of Chemistry, Pohang University of Science and Technology, San31 Hyoja-dong Nam-gu Pohang, Kyungbuk 790-784, Korea, Fax: +82 54 279 3399; Tel: +82 54 279 2123; E-mail: [skshin@postech.ac.kr](mailto:skshin@postech.ac.kr)

<sup>b</sup> Nanobio Fusion Research Center, Korea Research Institute of Standards and Science, 1 Doryong-dong, Yuseong-gu, Daejeon 305-340, Korea, Fax: +82 42 868 5032; Tel: +82 42 868 5214; [nwsong@kriss.re.kr](mailto:nwsong@kriss.re.kr)

<sup>c</sup> Cell Dynamics Research Center, Gwangju Institute of Science and Technology, 261 Oryong-dong, Buk-gu, Gwangju 500-712, Republic of Korea

\*To whom all correspondence should be addressed.

#### Figure Caption

**Figure S1.** The HRTEM images of organic-soluble CdSe and CdSe/ZnS nanocrystals

**Figure S2.** The hydrodynamic size distributions of water-soluble CdSe and CdSe/ZnS nanocrystals

**Figure S3.** The amplitude-time variation profile of photoluminescence decay components: (a) Four exponential-decay components in solution; (b) three exponential-decay components in glass substrate.

(a) CdSe

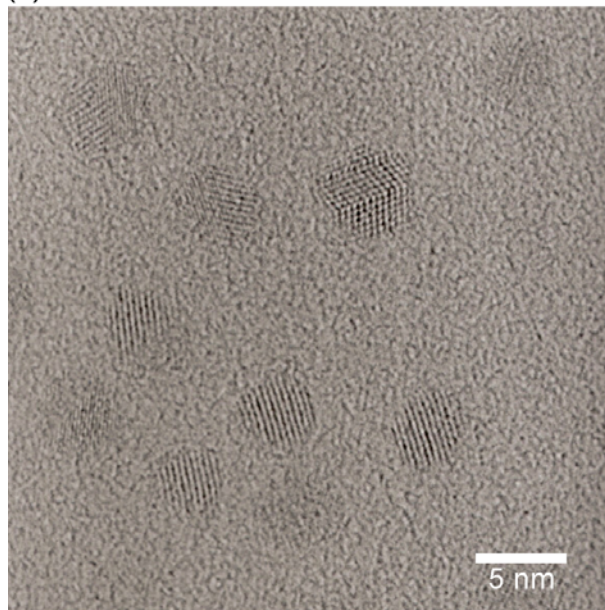

(b) CdSe/ZnS

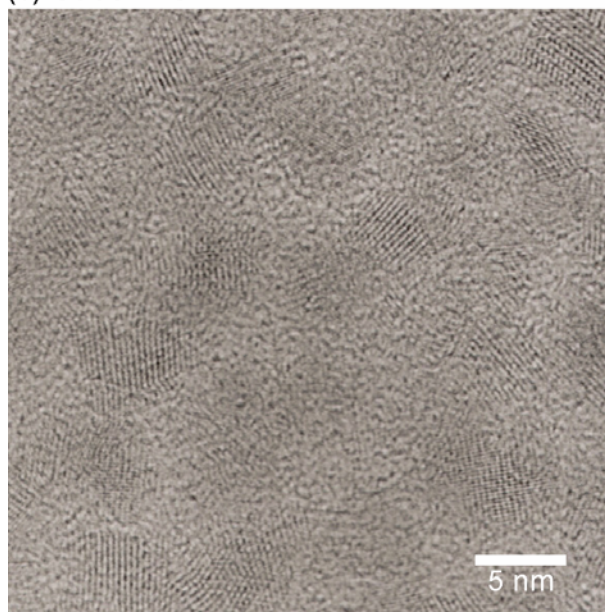

**Figure S1**

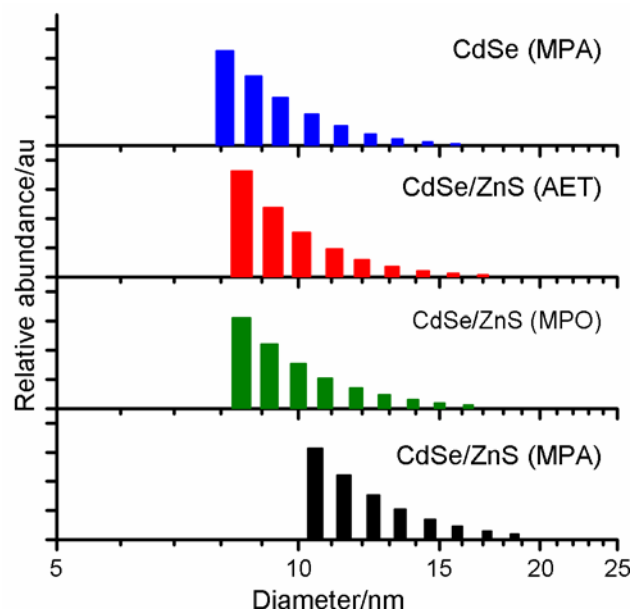

**Figure S2**

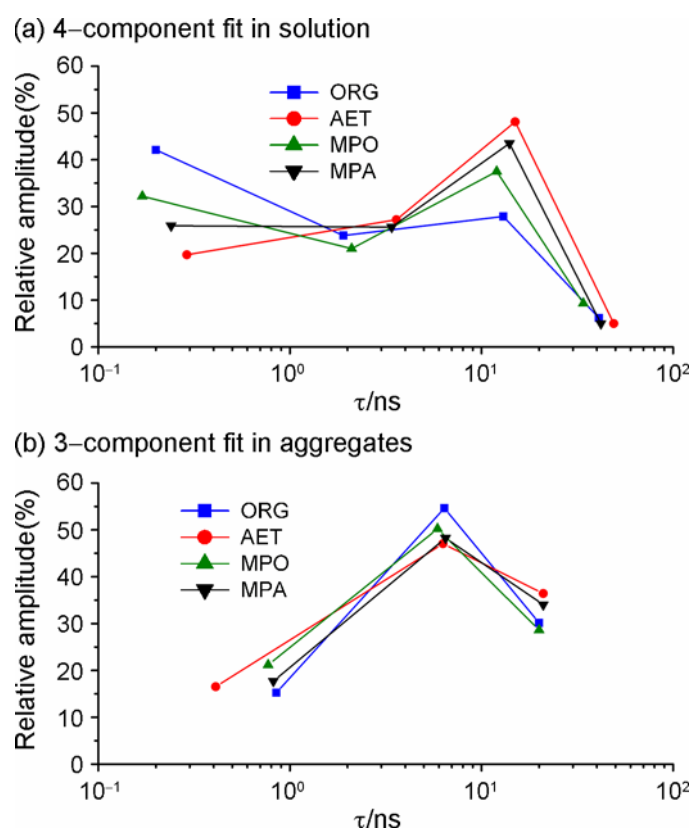

Figure S3
